# Supplementary material for: Integrative Evaluation of the Clinical Significance Underlying Protein Arginine Methyltransferases in Hepatocellular Carcinoma
Source: MDPI journal article supplement (doi:10.3390/cancers15164183), 2023-08-20
Supplement: s1 [file s1]

**Supplement Table S1. Clinical characteristics of the patient population with PRMT1 expression**

|            | variables | PRMT1 <sup>+</sup> |     | Total | <i>p</i> value |
|------------|-----------|--------------------|-----|-------|----------------|
|            |           | high               | low |       |                |
| Age (year) |           |                    |     |       | 0.7657         |
|            | ≤60       | 16                 | 27  | 43    |                |
|            | >60       | 4                  | 7   | 11    |                |
| Grade      |           |                    |     |       | 0.8152         |
|            | I/II      | 10                 | 23  | 33    |                |
|            | III       | 7                  | 14  | 21    |                |
| Tumor size |           |                    |     |       | 0.7818         |
|            | ≤3.5cm    | 4                  | 10  | 14    |                |
|            | >3.5cm    | 15                 | 25  | 40    |                |
| TNM stage  |           |                    |     |       | 0.2017         |
|            | I/II      | 7                  | 18  | 25    |                |
|            | III/IV    | 13                 | 16  | 29    |                |

**Supplement Table S2. Clinical characteristics of the patient population with PRMT1 expressed in Tex**

|            | variables | PRMT1-Tex <sup>+</sup> |     | Total | <i>p</i> value |
|------------|-----------|------------------------|-----|-------|----------------|
|            |           | high                   | low |       |                |
| Age (year) |           |                        |     |       | 0.7625         |
|            | ≤60       | 7                      | 36  | 43    |                |
|            | >60       | 2                      | 9   | 11    |                |
| Grade      |           |                        |     |       | 0.7600         |
|            | I/II      | 4                      | 29  | 33    |                |
|            | III       | 4                      | 17  | 21    |                |
| Tumor size |           |                        |     |       | 0.9410         |
|            | ≤3.5cm    | 3                      | 11  | 14    |                |
|            | >3.5cm    | 7                      | 33  | 40    |                |
| TNM stage  |           |                        |     |       | 0.9274         |
|            | I/II      | 5                      | 20  | 25    |                |
|            | III/IV    | 5                      | 24  | 29    |                |
