# Supplementary material for: Integrative Evaluation of the Clinical Significance Underlying Protein Arginine Methyltransferases in Hepatocellular Carcinoma
Source: MDPI journal article supplement (doi:10.3390/cancers15164183), 2023-08-20
Supplement: s1 [file s1]

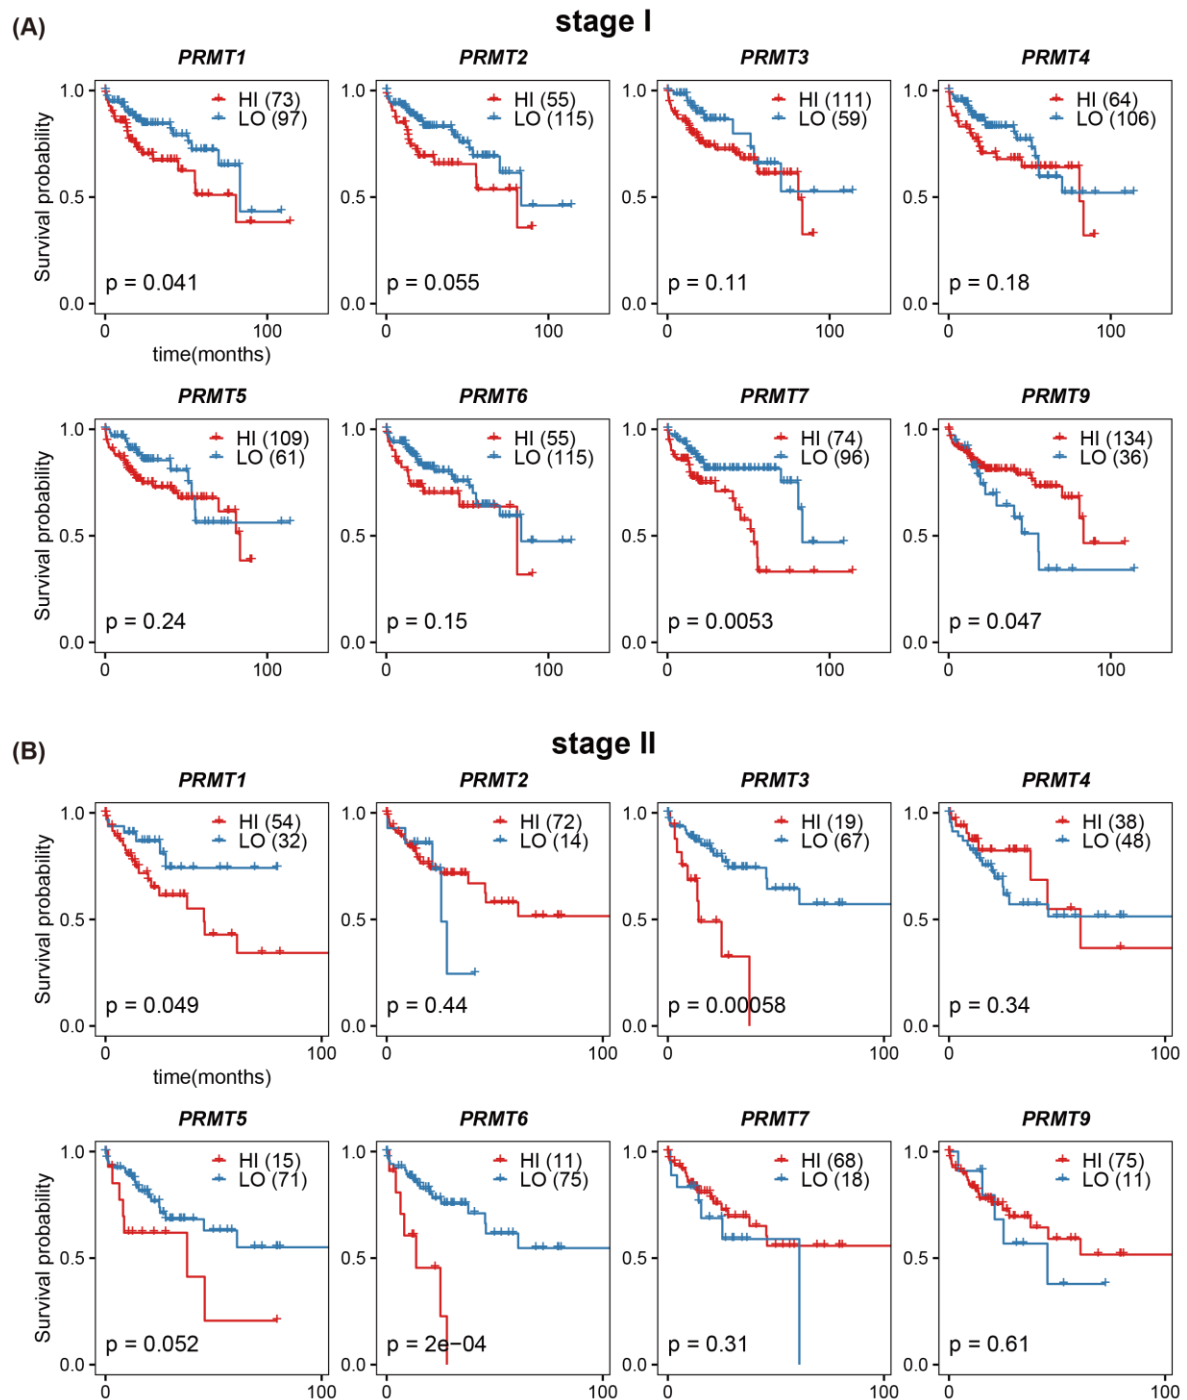

**Supplementary Figure S1. Prognostic significance of PRMTs in patients with different stages of HCC. (A, B)** Survival probabilities (Kaplan–Meier curves) in different stages (Stage I and II) of HCC show the association between hepatic PRMT expression and overall survival. The patients were divided into two groups based on their PRMT gene expression levels: one with high expression and the other with low expression, determined by the R package, *multipleROC*. Survival probabilities were estimated using the R packages, *survminer* and *survival*.
