# Supplementary material for: Integrative Evaluation of the Clinical Significance Underlying Protein Arginine Methyltransferases in Hepatocellular Carcinoma
Source: MDPI journal article supplement (doi:10.3390/cancers15164183), 2023-08-20
Supplement: s1 [file s1]

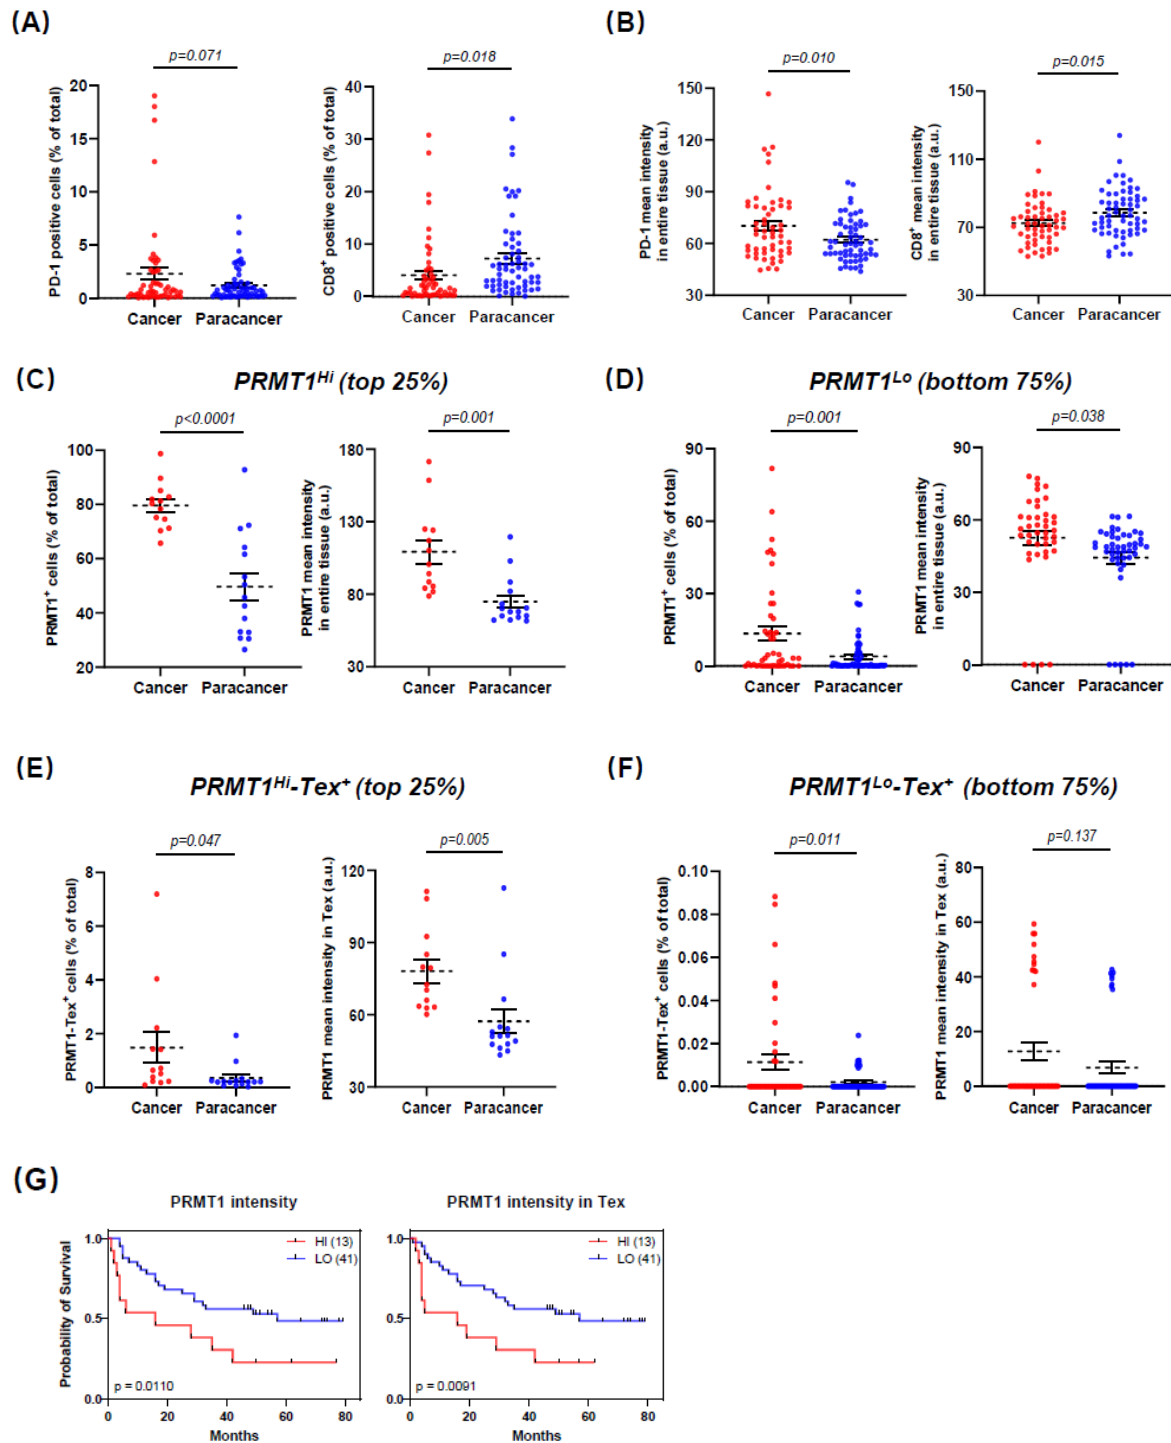

**Supplement Figure S2.** Prognostic significance of PRMT1 and PRMT1-Tex in HCC patients. (A, B) The expression patterns (positive rate and expression intensity) of PD-1 are statistically higher in HCC, compared to normal tissues, contrary to those of CD8<sup>+</sup>. (C-F) The expression patterns of PRMT1 are statistically higher in HCC with both PRMT1<sup>Hi</sup> (C) and PRMT1<sup>Lo</sup> (D), consistent with the expression patterns of PRMT1 in Tex of HCC (E,F), compared to normal tissues. (G) Survival probabilities (Kaplan–Meier curves) show the correlation between PRMT1 (or PRMT1-Tex) expression intensity and overall survival. The R package, multipleROC, divided into two groups (i.e., Hi vs Lo) according to the optimal gene expression level of PRMT1 (or PRMT1-Tex). The R packages, survminer and survival, estimated the survival probability.
